# Supplementary material for: Long conducting polymer nanonecklaces with a ‘beads-on-a-string’ morphology: DNA nanotube-template synthesis and electrical properties
Source: Royal Society of Chemistry journal article supplement (doi:10.1039/c6nr01603k), 2016-01-01
Supplement: c6nr01603k1.pdf [file c6nr01603k1.pdf]

## Supporting Information

# **Long conducting polymer nanonecklaces with a 'beads-on-a-string' morphology: DNA nanotubes-template synthesis and their electrical property**

Guofang Chen,<sup>\*a</sup> and Chengde Mao<sup>\*b</sup>

<sup>a</sup>*Department of Chemistry, St John's University, Queens, New York, 11439, USA.*

<sup>b</sup>*Department of Chemistry, Purdue University, West Lafayette, Indiana 47907, USA.*

*\* Corresponding Authors*

*\* E-mail: gfchen08@yahoo.com; mao@purdue.edu*

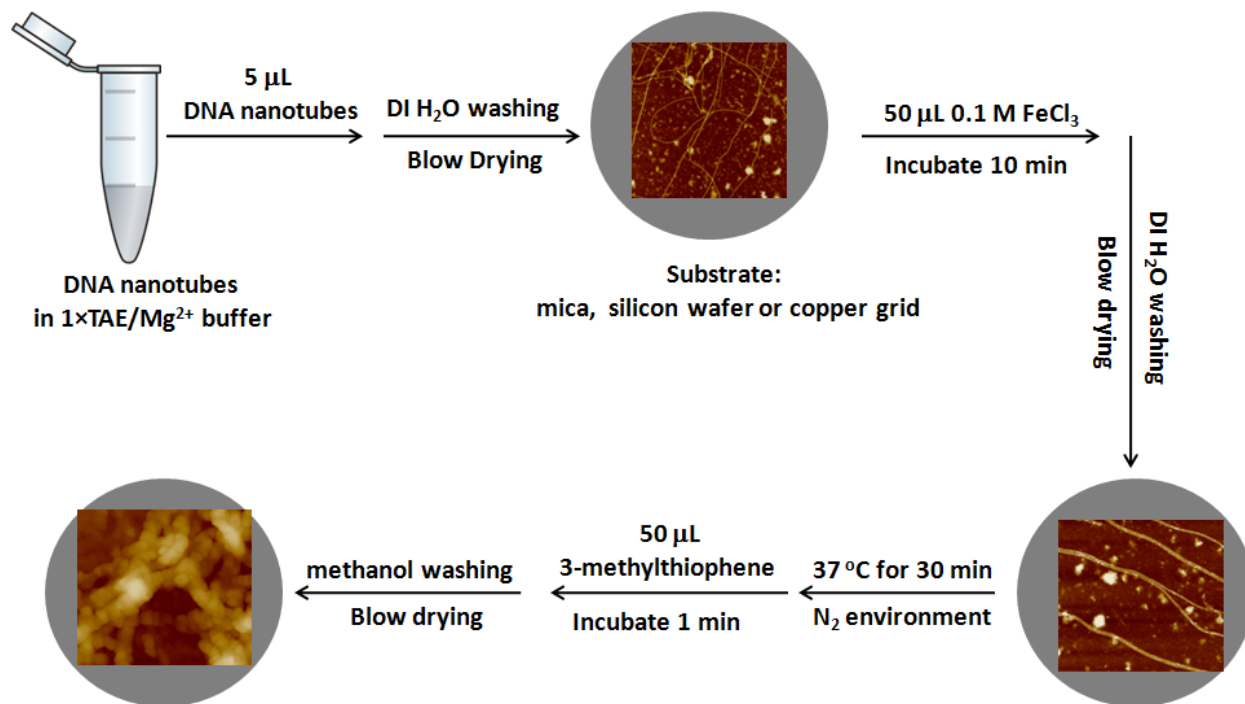

**Fig. S1** Schematic of the synthesis of long conducting PMTP nanonecklaces based on self-assembled DNA nanotubes

## Experimental Section

### *Formation of self-assembled DNA nanotubes by 2-day slow annealing*

The sequence of 52-nucleotide ssDNA with 4 palindromic segments of 10, 16, 16 and 10 bases long (5'- CCA AGC TTG GAC TTC AGG CCT GAA GTG GTC ATT CGA ATG ACC TGA GCG CTC A -3') were designed by a computer program "SEQUIN".<sup>1</sup> All oligonucleotides were purchased from IDT, Inc. and purified by 20% denaturing polyacrylamide gel electrophoresis (PAGE); bands were cut out of gels and eluted in a solution containing ammonium acetate (500 mM), magnesium acetate (10 mM), and ethylenediamine tetraacetic acid (EDTA; 1 mM). The

self-assembled DNA nanotubes were formed following the modified procedure published in previous paper.<sup>[17]</sup> Briefly, 20  $\mu\text{L}$  ssDNA of 5  $\mu\text{M}$  was prepared by dissolving the purified oligonucleotides (52 nt) in 1 $\times$ TAE/Mg<sup>2+</sup> buffer (40 mM Tris base, 20 mM acetic acid, 2 mM EDTA and 12.5 mM magnesium acetate). Then slowly cool down solution from 95 to 4  $^{\circ}\text{C}$  for 48 h.

*Template-synthesis of PMTP/DNA nanonecklaces at surface-immobilized DNA nanotubes*

1. On mica by blow drying

5  $\mu\text{L}$  of self-assembled DNA nanotubes in 1 $\times$ TAE/Mg<sup>2+</sup> buffer was deposited onto the freshly cleaved mica and blown dry with compressed air. The surface was rinsed with DI water and blown dry. Then 50  $\mu\text{L}$  of 0.1 M FeCl<sub>3</sub> aqueous solution was added onto the mica and left to incubate for 10 min within closed petri dish, followed by 4 cycles of DI water washing and compressed air blow drying. To initiate efficient polymerization reaction, the residual water should be removed thoroughly and oxygen-free reaction environment need to be kept. Therefore, the mica with FeCl<sub>3</sub>-impregnated DNA nanotubes was heated at 37  $^{\circ}\text{C}$  for 30 min to remove the residual water, followed by blow dry with the compressed nitrogen. Subsequently, 50  $\mu\text{L}$  of 3-methylthiophene monomer was added and allowed to incubate with FeCl<sub>3</sub>-impregnated DNA for 1 min. After removing the 3-methylthiophene monomer by compressed air blowing, the surface was rinsed thoroughly with methanol to further clean un-reacted monomer, dried with compressed air and characterized with AFM.

2. On UV ozone-modified silicon wafer with the gold source-drain electrodes by natural drying

For the electrical measurement, PMTP/DNA nanonecklaced structures were also prepared on silicon wafer with the gold source-drain electrodes. The embedded gold electrodes were formed by photolithography on a Si wafer with 300-nm SiO<sub>2</sub> surface layer. The silicon wafer was first cleaned with hot piranha solution (H<sub>2</sub>SO<sub>4</sub> (98%)/H<sub>2</sub>O<sub>2</sub> (30%) = 7/3 (v/v)), followed by sonication in DI water and acetone for 6 min respectively. Then the silicon wafer was modified to be hydrophilic by the exposure to UV-ozone for 1 h. To form PMTP/DNA nanonecklaces on the silicon wafer, 20 μL of self-assembled DNA nanotubes in 1×TAE/Mg<sup>2+</sup> buffer was deposited and left to evaporate till complete drying. Then 100 μL of 0.1 M FeCl<sub>3</sub> aqueous solution was added onto the silicon wafer and allowed to incubate for 10 min within closed petri dish, followed by 4 cycles of DI water washing and compressed air blow drying. Moreover, the silicon wafer with FeCl<sub>3</sub>-impregnated DNA nanotubes was heated at 37 °C for 30 min to remove the residual water, followed by blow dry with the compressed nitrogen. Subsequently, 100 μL of 3-methylthiophene monomer was added and allowed to incubate with FeCl<sub>3</sub>-impregnated DNA for 1 min. After removing the 3-methylthiophene monomer by compressed air blowing, the surface was rinsed thoroughly with methanol to further clean un-reacted monomer, dried with compressed air and characterized with AFM and Keithley 4200 Semiconductor Characterization System.

### 3. On carbon-coated copper TEM grids

The carbon-coated copper TEM grid was modified to be hydrophilic by the exposure to UV-ozone for 30 min. To form PMTP/DNA nanonecklaces on the TEM grid, 10 μL of self-assembled DNA nanotubes in 1×TAE/Mg<sup>2+</sup> buffer was deposited on the grid held by self close clamping tweezer and left to evaporate till complete drying. Then 10 μL of 0.1 M FeCl<sub>3</sub> aqueous

solution was added onto the copper TEM grid and allowed to incubate for 10 min within closed petri dish, followed by 4 cycles of DI water washing and compressed air blow drying. Moreover, the TEM grid with FeCl<sub>3</sub>-impregnated DNA nanotubes was heated at 37 °C for 30 min to remove the residual water, followed by blow dry with the compressed nitrogen. Subsequently, 10 μL of 3-methylthiophene monomer was added and allowed to incubate with FeCl<sub>3</sub>-impregnated DNA for 1 min. After removing the 3-methylthiophene monomer by compressed air blowing, the surface was rinsed thoroughly with methanol to further clean un-reacted monomer, dried with compressed air, and characterized by TEM/EDX.

#### *AFM imaging*

A MultiMode 8 AFM (Bruker) was used to image the samples under ScanAsyst-Air mode, using a ScanAsyst-air nanoprobe (Bruker).

#### *TEM/EDX characterization*

Dark-field TEM imaging and EDX element analysis were conducted on a Tecnai T20 field emission transmission electron microscope with accelerating voltage of 200 kV.

#### *Two terminal current-voltage characterization*

Two-terminal current-voltage measurements were performed using Signatone Triaxial Probe Station and Keithley 4200 Semiconductor Characterization System. The current was measured for applied voltages from -10 to 10 V in steps of 0.05 V. All of the electrical measurements were carried out in air at room temperature.

#### **Reference**

1. N. C. Seeman, *J. Biomol. Struct. Dyn.* 1990, **8**, 573.
